# Supplementary material for: A green synthesis of “naked” Pt and PtPd catalysts for highly efficient methanol electrooxidation
Source: Royal Society of Chemistry journal article supplement (doi:10.1039/c6ra09516j), 2016-01-01
Supplement: c6ra09516j1.pdf [file c6ra09516j1.pdf]

## Electronic Supplementary Information

### A green synthesis of “naked” Pt and PtPd catalysts for highly efficient methanol electrooxidation

Baohua Zhang,<sup>a</sup> Yiguo Xue,<sup>b</sup> Hong Sun,<sup>a</sup> Anning Jiang,<sup>a</sup> Zhonghao Li<sup>\*a</sup> and

Jingcheng Hao<sup>a</sup>

<sup>a</sup> Key Laboratory of Colloid and Interface Chemistry, Shandong University, Ministry of Education, Jinan 250100, China. Fax: (+86) 531-88564750; Tel: (+86) 531-88363821.

<sup>b</sup> Geotechnical and Structural Engineering Research Center of Shandong University, Jinan 250061, China.

\*Corresponding authors: zhonghaoli@sdu.edu.cn.

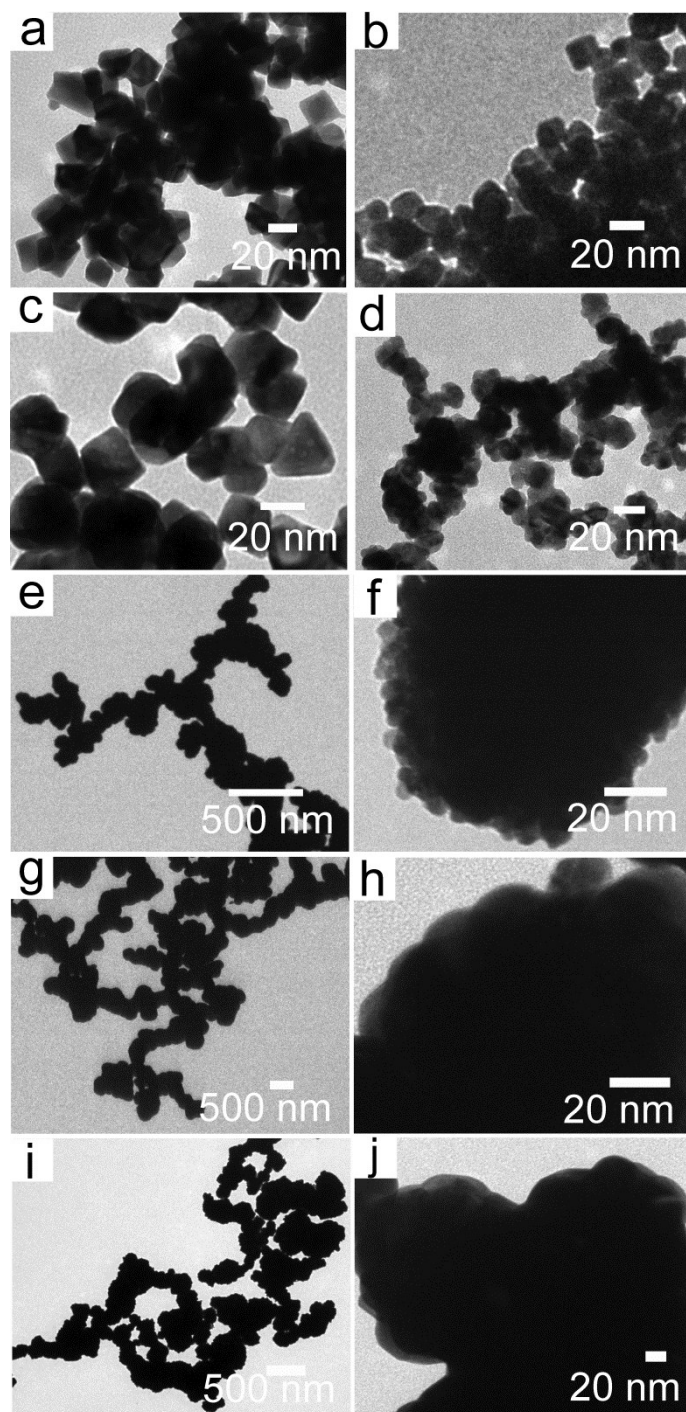

**Fig. S1** TEM images of Pt<sub>0.10</sub>, Pt<sub>0.52</sub>, Pt<sub>1.04</sub>, Pt<sub>4.16</sub>, Pt<sub>8.33</sub>, Pt<sub>10.41</sub>, Pt<sub>14.57</sub> particles synthesized at the acetic acid concentration of 0.10 M (a), 0.52 M (b), 1.04M (c), 4.16 M (d), 8.33M (e, f), 10.41 M (g, h), 14.57 M (i, j).

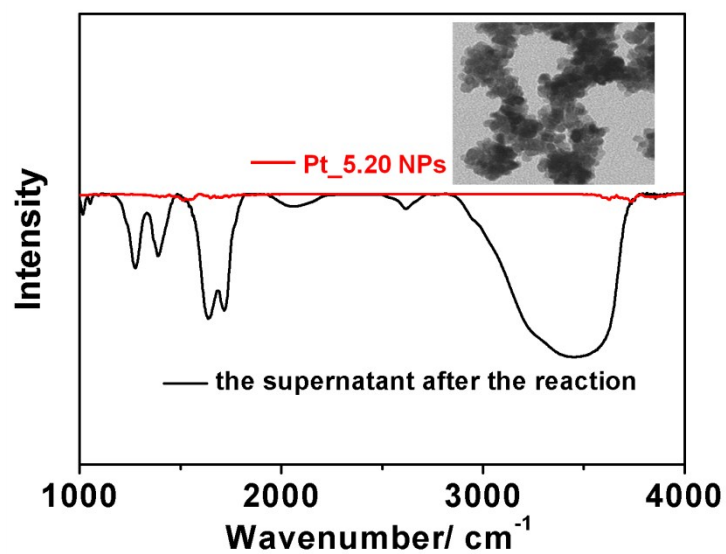

**Fig. S2** FTIR spectra of the synthesized Pt NPs and the supernatant after the reaction.

**Table S1** The  $E_{\text{onset}}$  of Pt<sub>5.20</sub>, Pt<sub>3</sub>Pd<sub>1.5.20</sub> NPs and commercial Pt black at different cycle number.

|               | Pt <sub>5.20</sub> ●   | Pt <sub>3</sub> Pd <sub>1.5.20</sub> ● | Pt Black ● |
|---------------|------------------------|----------------------------------------|------------|
| Number/ cycle | $E_{\text{onset}}$ [V] |                                        |            |
| 1             | 0.171                  | 0.145                                  | 0.173      |
| 500           | 0.168                  | 0.152                                  | 0.158      |
| 100           | 0.163                  | 0.163                                  | 0.163      |
| 1500          | 0.182                  | 0.151                                  | 0.145      |
| 2000          | 0.165                  | 0.168                                  | 0.113      |
| 2500          | 0.185                  | 0.175                                  | 0.190      |
| 3000          | 0.182                  | 0.166                                  | 0.183      |
